# Supplementary material for: Molecule-bridged electron-selective contact for high-efficiency halide-based perovskite solar cells
Source: Royal Society of Chemistry journal article supplement (doi:10.1039/d4ta02884h), 2024-01-01
Supplement: d4ta02884h1.pdf [file d4ta02884h1.pdf]

## Supporting information

### **Molecule-bridged Electron-selective Contact for High-efficient Halide-based Perovskite Solar Cells†**

Kun He<sup>a#</sup>, Jie Zhang<sup>b#</sup>, Xiaoliang Zhao<sup>a</sup>, Fei Liu<sup>a</sup>, Ruiqian Chen<sup>b</sup>, Jintao Ma<sup>a</sup>, Bin Du<sup>a\*</sup>, Yanlong Wang<sup>c\*</sup>, Lin Song<sup>b\*</sup>

<sup>a</sup> *School of Materials Science and Engineering, Xi'an Polytechnic University, Xi'an 710048, China*

<sup>b</sup> *Frontiers Science Center for Flexible Electronics (FSCFE), Institute of Flexible Electronics (IFE), Northwestern Polytechnical University, Xi'an 710072, China*

<sup>c</sup> *Dalian Institute of Chemical Physics, Chinese Academy of Sciences, Dalian 116023, China*

# Authors share equal authorship

† Electronic supplementary information (ESI) available.

\* [dubin@xpu.edu.cn](mailto:dubin@xpu.edu.cn) (B.D)

\* [wangyanlong@dicp.ac.cn](mailto:wangyanlong@dicp.ac.cn) (Y.W)

\* [iamsong@nwpu.edu.cn](mailto:iamsong@nwpu.edu.cn) (L.S)

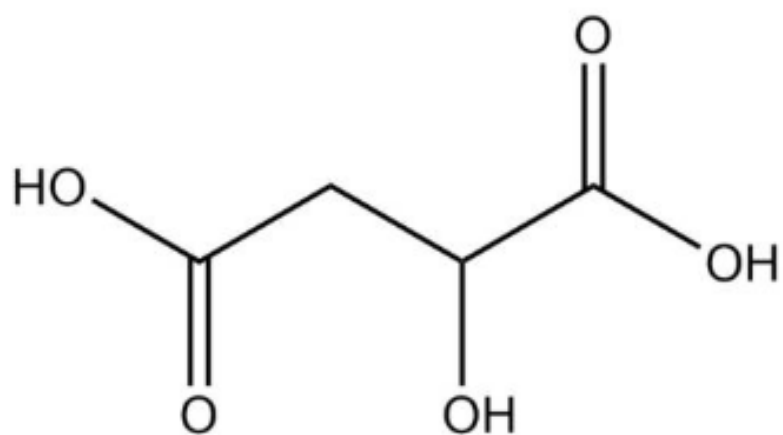

**Fig. S1.** Structure diagram of the molecular formula of H<sub>2</sub>Mi.

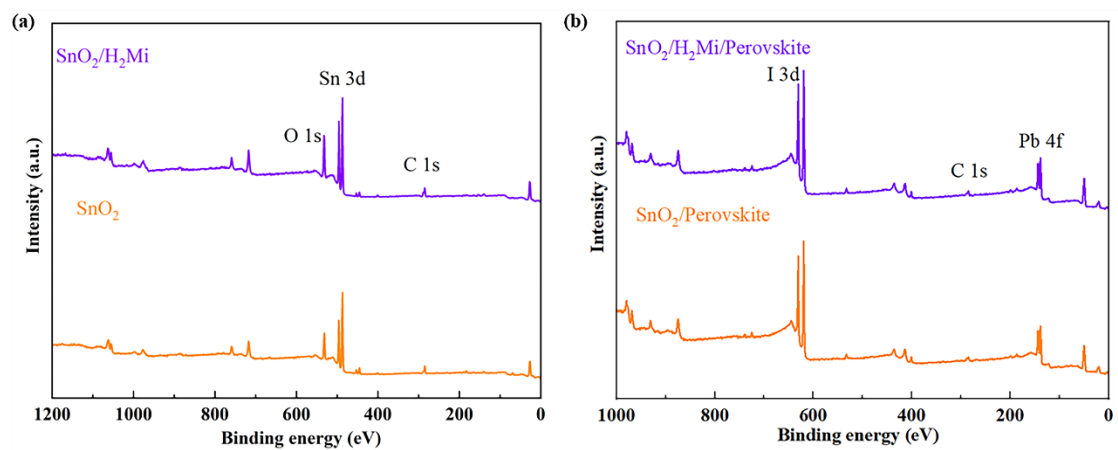

**Fig. S2.** (a) XPS full spectra of SnO<sub>2</sub> and SnO<sub>2</sub>/H<sub>2</sub>Mi. (b) XPS full spectra of SnO<sub>2</sub>/Perovskite and SnO<sub>2</sub>/H<sub>2</sub>Mi/Perovskite.

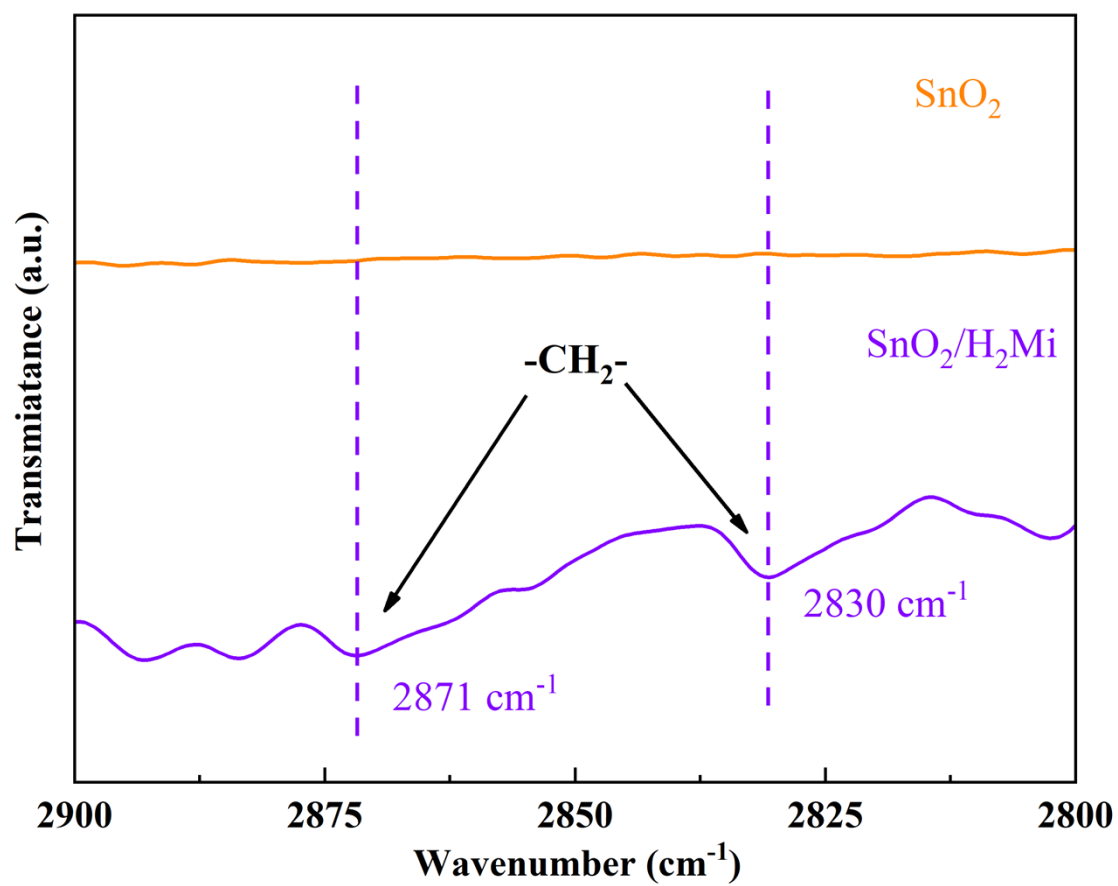

**Fig. S3.** FTIR spectra of SnO<sub>2</sub> and SnO<sub>2</sub>/H<sub>2</sub>Mi.

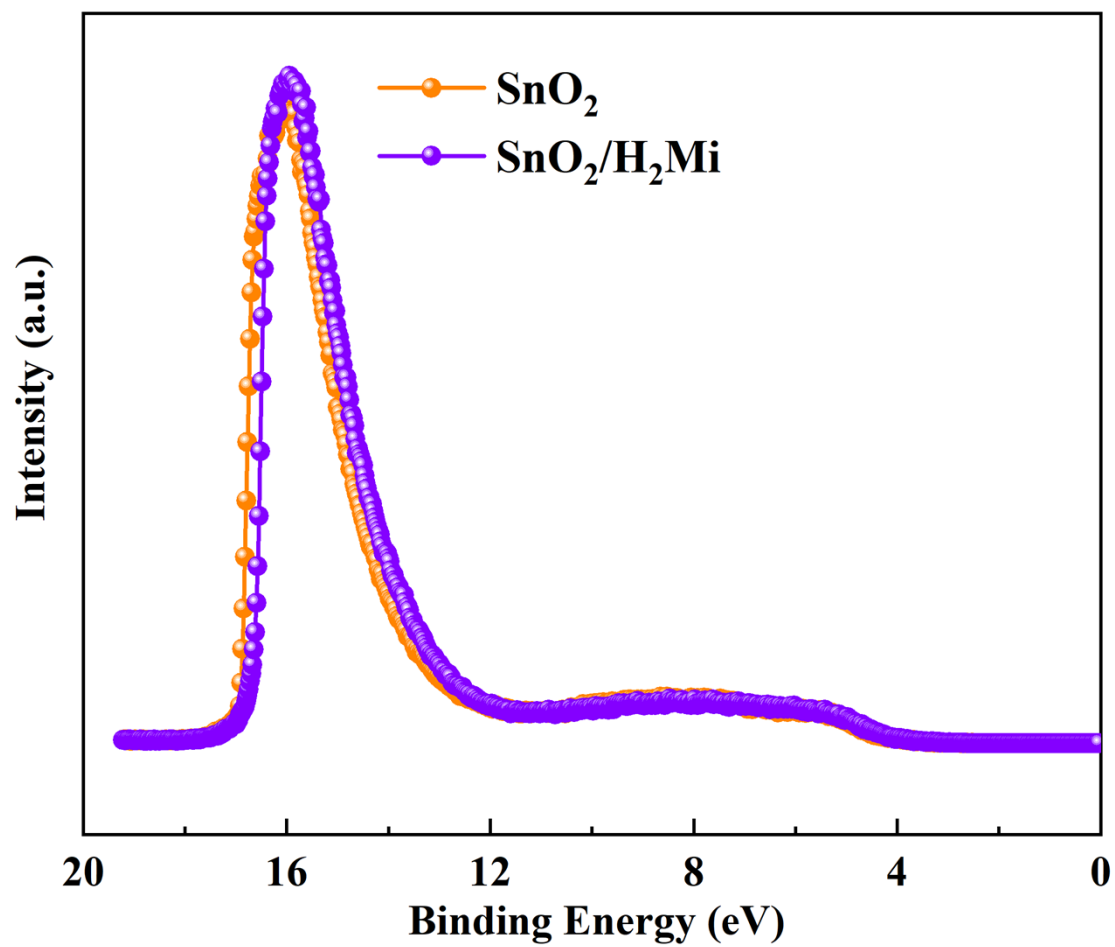

**Fig. S4.** UPS full spectra of SnO<sub>2</sub> and SnO<sub>2</sub>/H<sub>2</sub>Mi films.

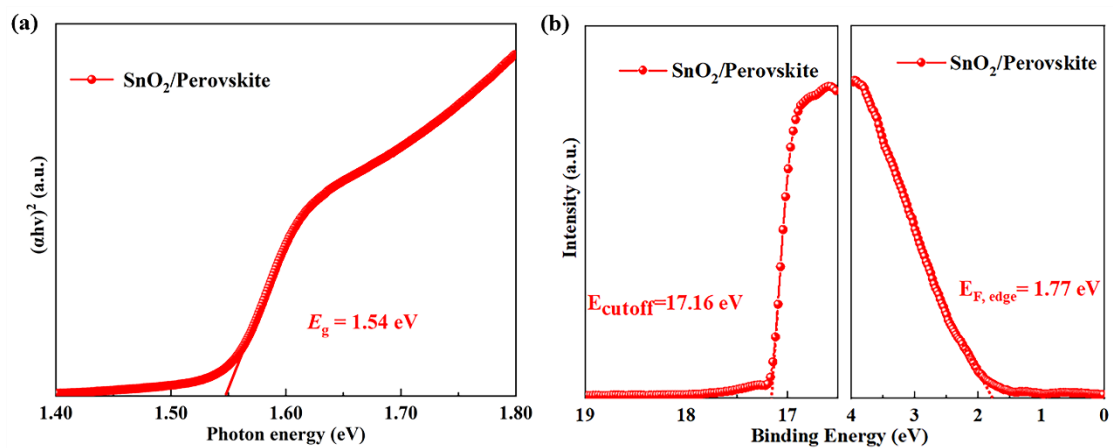

**Fig. S5.** (a) Tauc-Plot spectrum of perovskite films deposited on SnO<sub>2</sub>/Perovskite substrate. (b) UPS spectra of SnO<sub>2</sub>/Perovskite film.

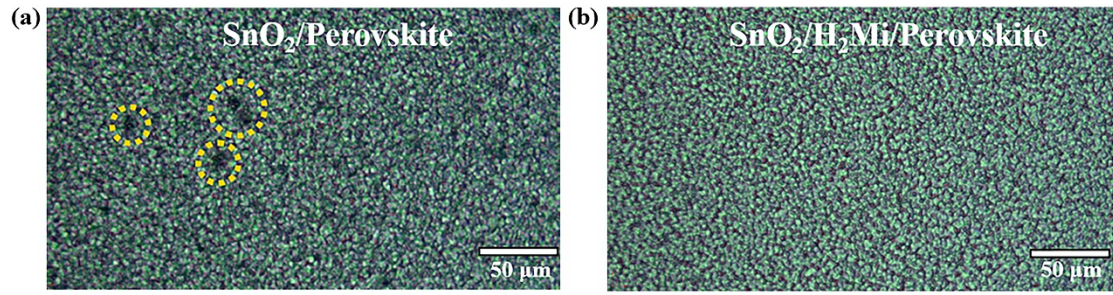

**Fig. S6.** OM images of perovskite films deposited on (a) SnO<sub>2</sub> and (b) SnO<sub>2</sub>/ H<sub>2</sub>Mi ETLs.

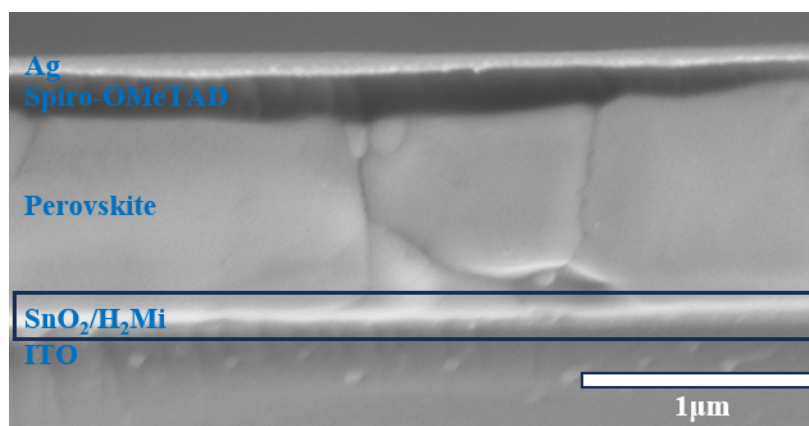

**Fig. S7.** The cross-sectional SEM images of the perovskite film treated with H<sub>2</sub>Mi.



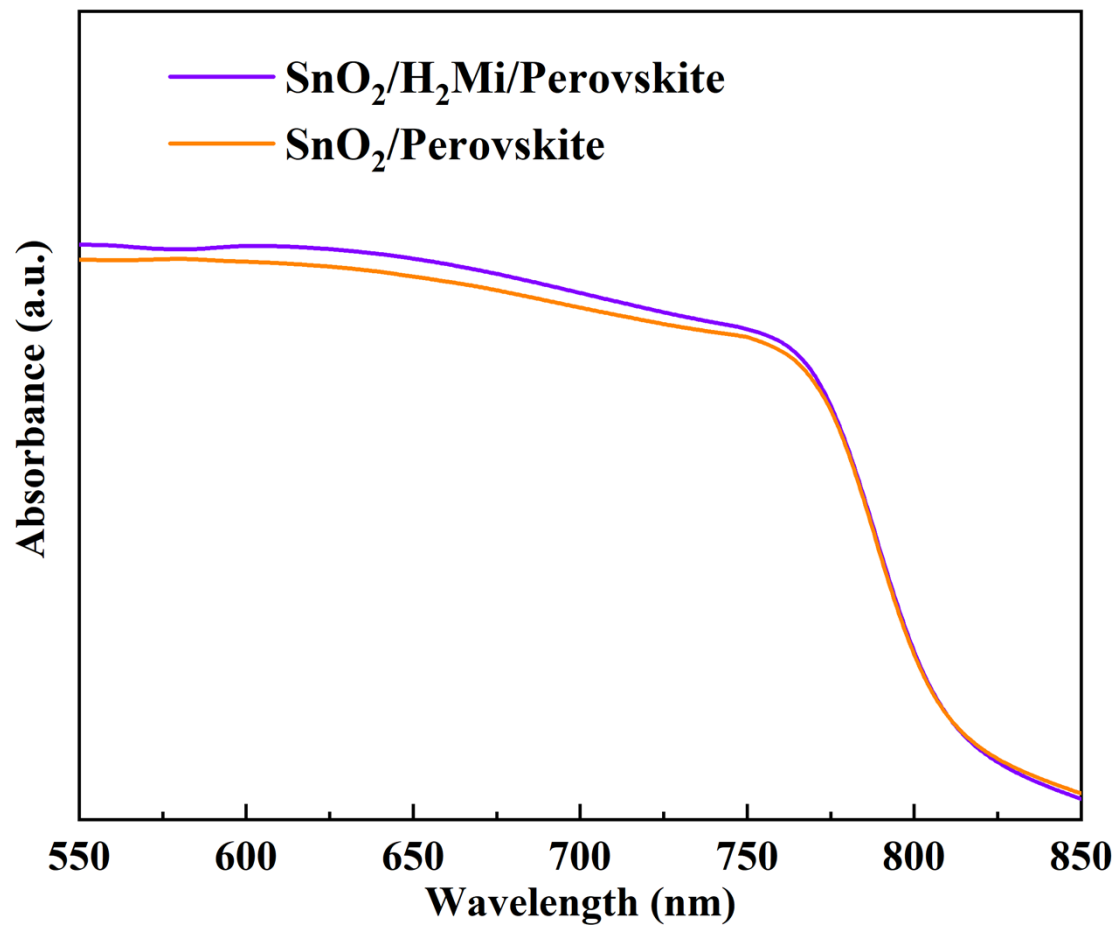

**Fig. S8.** UV/vis absorption spectra of perovskite films deposited on SnO<sub>2</sub> and SnO<sub>2</sub>/H<sub>2</sub>Mi ETLs.

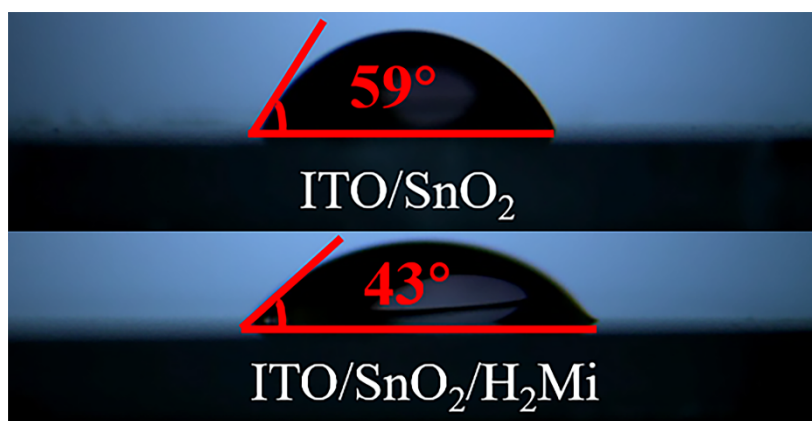

**Fig. S9.** The contact angle measurements of ITO/SnO<sub>2</sub> and ITO/SnO<sub>2</sub>/H<sub>2</sub>Mi films.

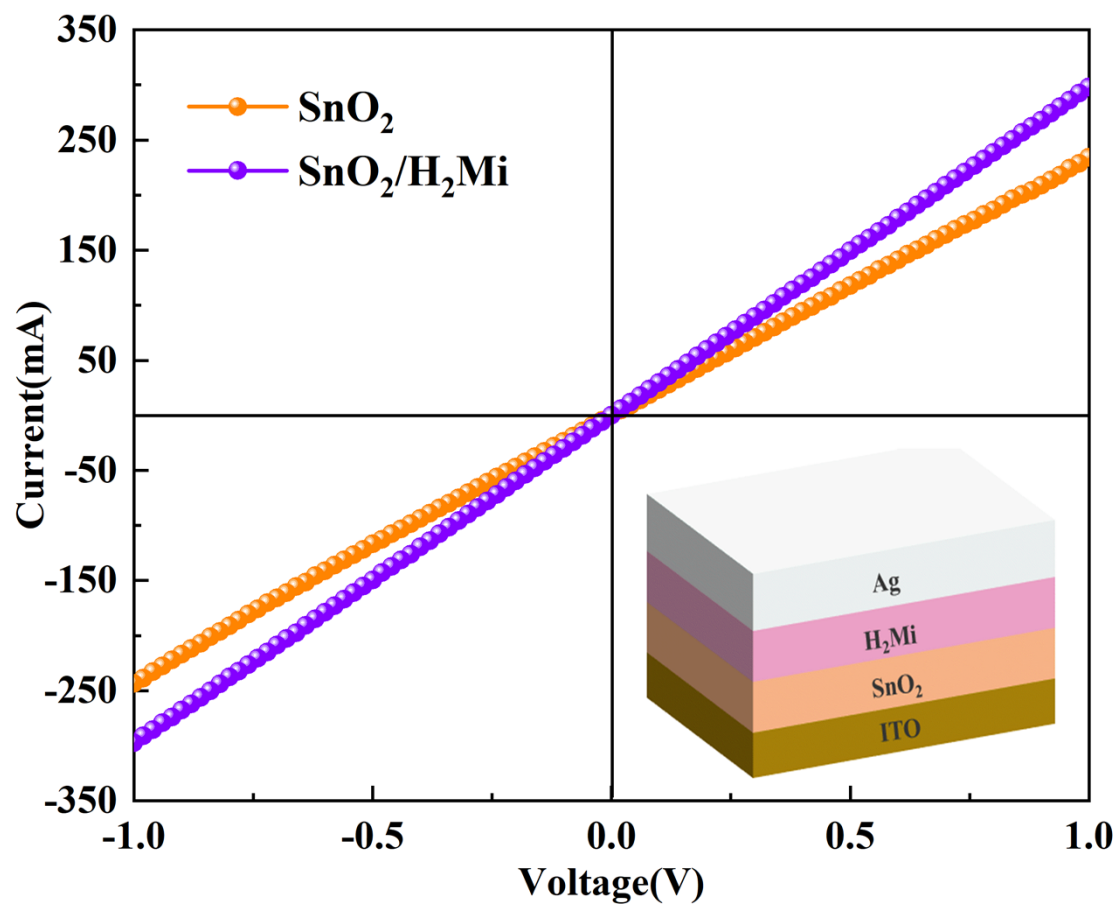

**Fig. S10.** I–V curves of devices based on SnO<sub>2</sub> and SnO<sub>2</sub>/H<sub>2</sub>Mi ETLs. The inset depicts the device structure.

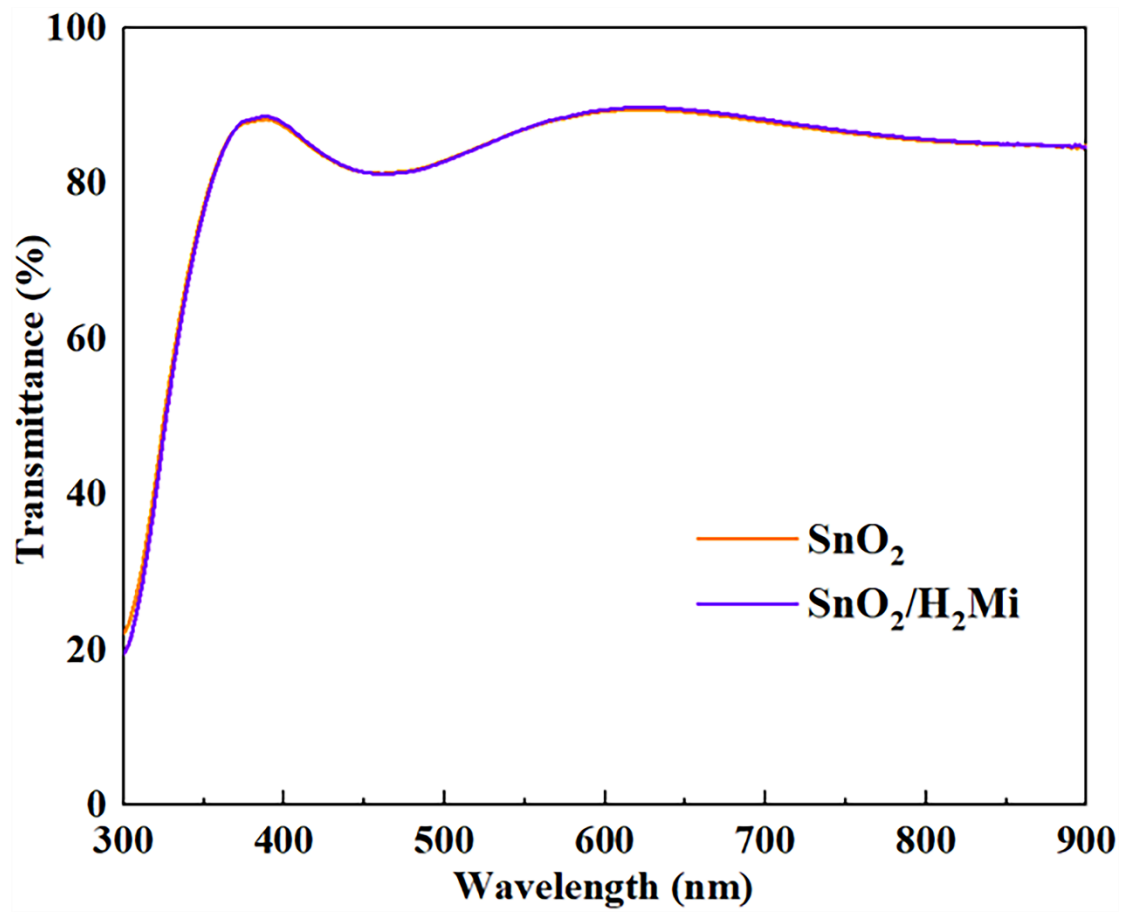

**Fig. S11.** UV-vis absorption spectra of SnO<sub>2</sub> and SnO<sub>2</sub>/ H<sub>2</sub>Mi ETLs.

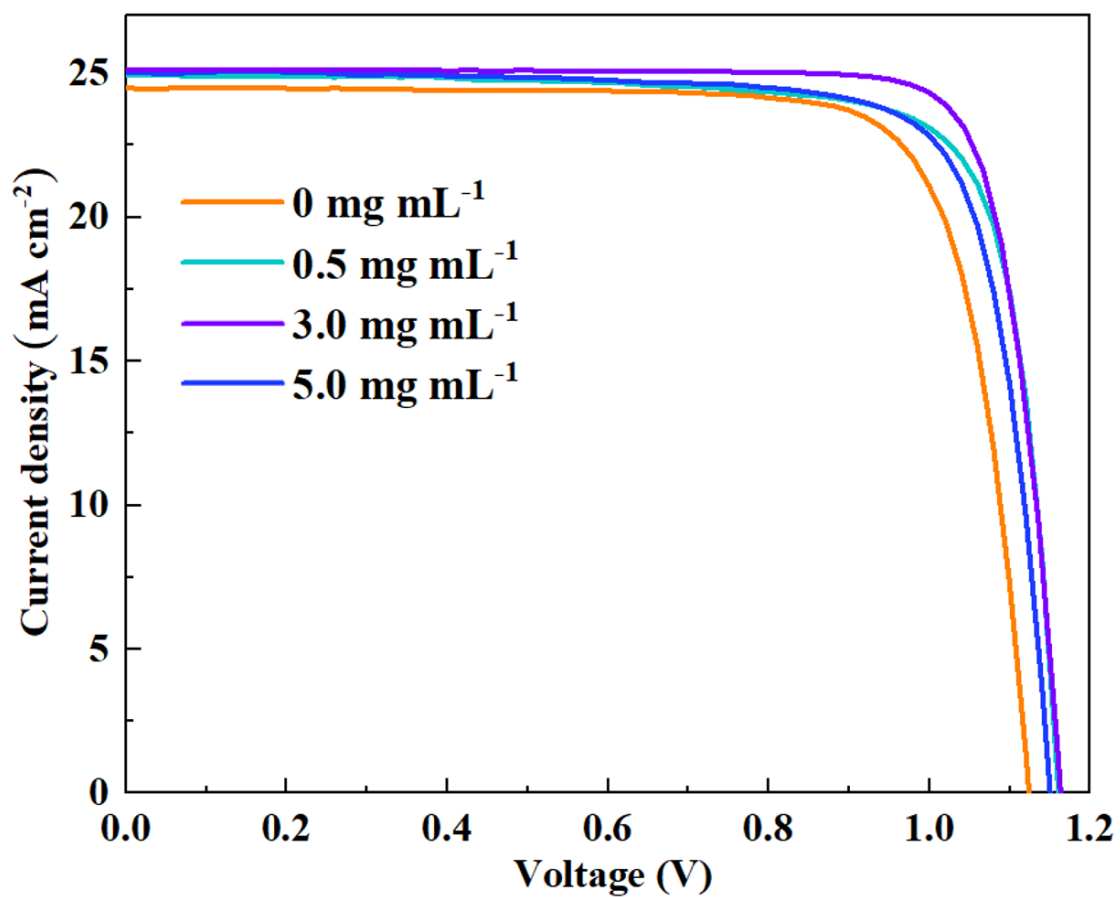

**Fig. S12.** J-V curves of the device based on SnO<sub>2</sub> passivated with different concentrations of H<sub>2</sub>Mi.

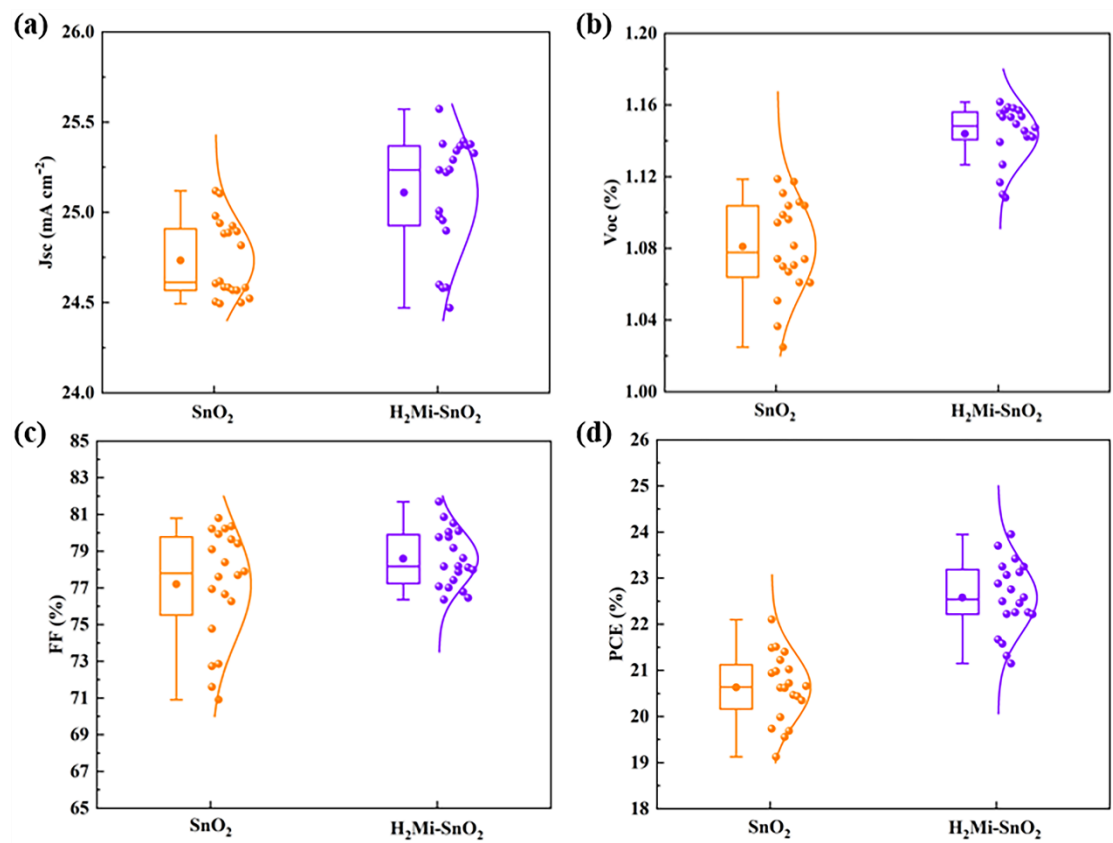

**Fig. S13.** The box plots of (a)  $J_{sc}$ , (b)  $V_{oc}$ , (c) FF, and (d) PCE of the unencapsulated devices.

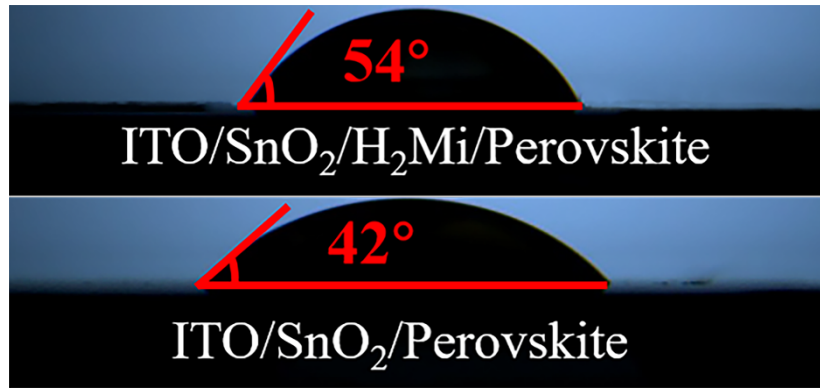

**Fig. S14.** The contact angle measurements of perovskite precursor solution on ITO/SnO<sub>2</sub> and ITO/SnO<sub>2</sub>/H<sub>2</sub>Mi.

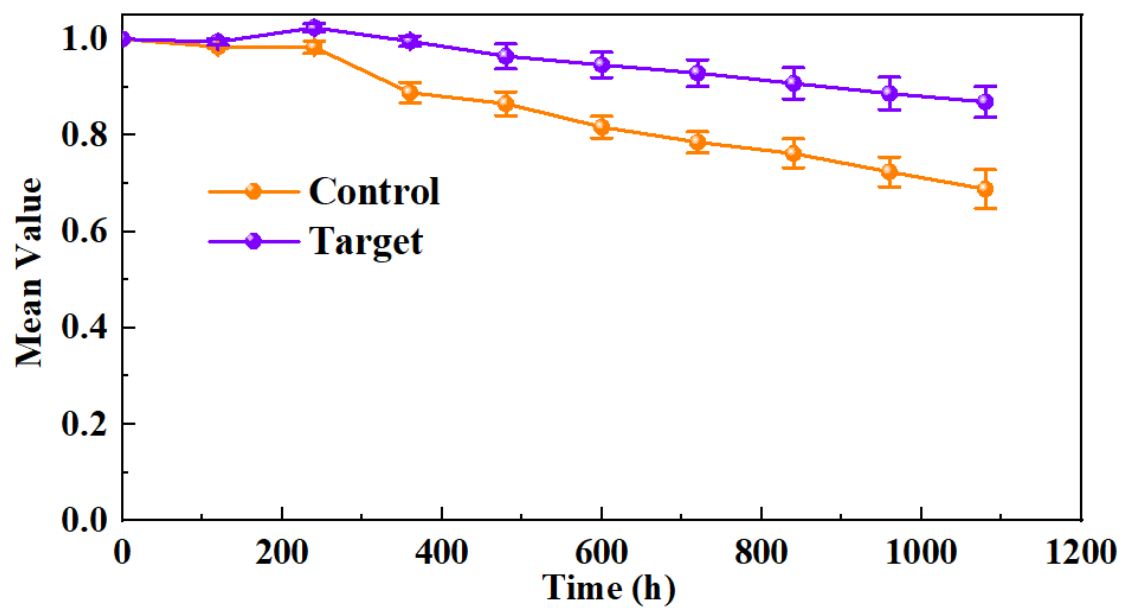

Fig. S15. The environmental stability curves of the control and H2Mi-modified devices



**Table S1.** Calculated parameters for the energy level of SnO<sub>2</sub>, SnO<sub>2</sub>/H<sub>2</sub>Mi, and perovskite.

| <b>Sample</b>                          | <b>E<sub>cutoff</sub> (eV)</b> | <b>W<sub>F</sub> (eV)</b> | <b>E<sub>F, edge</sub> (eV)</b> | <b>E<sub>VB</sub> (eV)</b> | <b>E<sub>g</sub> (eV)</b> | <b>E<sub>CB</sub> (eV)</b> |
|----------------------------------------|--------------------------------|---------------------------|---------------------------------|----------------------------|---------------------------|----------------------------|
| <b>SnO<sub>2</sub></b>                 | <b>16.61</b>                   | <b>4.61</b>               | <b>3.92</b>                     | <b>-8.53</b>               | <b>3.90</b>               | <b>-4.63</b>               |
| <b>SnO<sub>2</sub>/H<sub>2</sub>Mi</b> | <b>16.88</b>                   | <b>4.34</b>               | <b>4.06</b>                     | <b>-8.40</b>               | <b>3.91</b>               | <b>-4.49</b>               |
| <b>Perovskite</b>                      | <b>17.16</b>                   | <b>4.06</b>               | <b>1.77</b>                     | <b>-5.83</b>               | <b>1.54</b>               | <b>-4.29</b>               |

**Table S2.** Calculated average crystallite sizes of perovskite with and without H<sub>2</sub>Mi modification according to Scherrer formula.

|                           | <b>2Theta(° )</b> | <b>FWHM(° )</b> | <b>D (nm)</b> |
|---------------------------|-------------------|-----------------|---------------|
| <b>Control-Perovskite</b> | <b>14.22</b>      | <b>0.144</b>    | <b>54.98</b>  |
| <b>Target-Perovskite</b>  | <b>14.22</b>      | <b>0.119</b>    | <b>66.53</b>  |

**Table S3.** The fitted data of TRPL curves.

| <b>Sample</b>                                      | <b><math>\tau_1</math> (ns)</b> | <b><math>\tau_2</math> (ns)</b> | <b><math>A_1</math></b> | <b><math>A_2</math></b> | <b><math>\tau_{ave}</math>(ns)</b> |
|----------------------------------------------------|---------------------------------|---------------------------------|-------------------------|-------------------------|------------------------------------|
| <b>SnO<sub>2</sub>/Perovskite</b>                  | <b>119.71</b>                   | <b>813.74</b>                   | <b>168.3</b>            | <b>1590.79</b>          | <b>803.11</b>                      |
| <b>SnO<sub>2</sub>/Perovskite /H<sub>2</sub>Mi</b> | <b>100</b>                      | <b>795.64</b>                   | <b>89.23</b>            | <b>832.59</b>           | <b>786.4</b>                       |

**Table S4.** Performance summary of champion devices based on SnO<sub>2</sub> and SnO<sub>2</sub> passivated with different concentrations of H<sub>2</sub>Mi.

|                               | $V_{OC}$ (V) | $J_{SC}$ (mA cm <sup>-2</sup> ) | FF (%)       | PCE (%)      |
|-------------------------------|--------------|---------------------------------|--------------|--------------|
| <b>0 mg mL<sup>-1</sup></b>   | <b>1.12</b>  | <b>24.48</b>                    | <b>79.00</b> | <b>21.71</b> |
| <b>0.5 mg mL<sup>-1</sup></b> | <b>1.16</b>  | <b>24.96</b>                    | <b>79.77</b> | <b>23.07</b> |
| <b>3.0 mg mL<sup>-1</sup></b> | <b>1.16</b>  | <b>25.12</b>                    | <b>83.35</b> | <b>24.34</b> |
| <b>5.0 mg mL<sup>-1</sup></b> | <b>1.15</b>  | <b>25.01</b>                    | <b>79.17</b> | <b>22.76</b> |

**Table S5.** The photovoltaic parameters of the PSCs prepared with and without H<sub>2</sub>Mi modification were measured in the reverse scan (RS) and forward scan (FS)

|                | <b>Sweep<br/>directio<br/>n</b> | <b><math>V_{OC}</math><br/>(V)</b> | <b><math>J_{SC}</math><br/>(mA cm<sup>-2</sup>)</b> | <b>FF<br/>(%)</b> | <b>PCE<br/>(%)</b> | <b>Hysteresi<br/>s<br/>index</b> |
|----------------|---------------------------------|------------------------------------|-----------------------------------------------------|-------------------|--------------------|----------------------------------|
| <b>Control</b> | <b>Reverse</b>                  | <b>1.12</b>                        | <b>24.48</b>                                        | <b>79.00</b>      | <b>21.71</b>       | <b>0.072</b>                     |
|                | <b>Forward</b>                  | <b>1.06</b>                        | <b>24.59</b>                                        | <b>77.41</b>      | <b>20.15</b>       |                                  |
| <b>Target</b>  | <b>Reverse</b>                  | <b>1.16</b>                        | <b>25.12</b>                                        | <b>83.35</b>      | <b>24.34</b>       | <b>0.038</b>                     |
|                | <b>Forward</b>                  | <b>1.16</b>                        | <b>25.29</b>                                        | <b>80.04</b>      | <b>23.42</b>       |                                  |

**Table S6.** The initial photovoltaic parameters of three groups of PSCs devices before and after H2Mi modification were tested for environmental stability.

| <b>Groups</b>   | <b>Sample</b>  | <b><math>V_{OC}</math> (V)</b> | <b><math>J_{SC}</math> (mA cm<sup>-2</sup>)</b> | <b>FF (%)</b> | <b>PCE (%)</b> |
|-----------------|----------------|--------------------------------|-------------------------------------------------|---------------|----------------|
| <b>Groups 1</b> | <b>Control</b> | <b>1.05</b>                    | <b>24.62</b>                                    | <b>79.94</b>  | <b>20.63</b>   |
|                 | <b>Target</b>  | <b>1.15</b>                    | <b>25.34</b>                                    | <b>80.09</b>  | <b>23.25</b>   |
| <b>Groups 2</b> | <b>Control</b> | <b>1.08</b>                    | <b>24.63</b>                                    | <b>78.54</b>  | <b>20.87</b>   |
|                 | <b>Target</b>  | <b>1.16</b>                    | <b>25.29</b>                                    | <b>80.05</b>  | <b>23.42</b>   |
| <b>Groups 3</b> | <b>Control</b> | <b>1.11</b>                    | <b>24.78</b>                                    | <b>74.51</b>  | <b>20.58</b>   |
|                 | <b>Target</b>  | <b>1.15</b>                    | <b>24.90</b>                                    | <b>80.52</b>  | <b>23.13</b>   |
